# Supplementary material for: Reproducing the invention of a named reaction: zero-shot prediction of unseen chemical reactions
Source: Royal Society of Chemistry journal article supplement (doi:10.1039/d1cp05878a), 2022-01-01
Supplement: d1cp05878a1.pdf [file d1cp05878a1.pdf]

Electronic Supplementary Material (ESI) for Organic Chemistry Frontiers.

This journal is © The Royal Society of Chemistry 2021

## Supporting Information

### Reproducing the invention of a named reaction: zero-shot prediction of unseen chemical reactions

An Su, ‡<sup>a</sup> Xinqiao Wang, ‡<sup>b</sup> Ling Wang, <sup>b</sup> Chengyun Zhang, <sup>b</sup> Yejian Wu, <sup>b</sup> Xinyi Wu, <sup>b</sup> Zhaoqingjie, <sup>d</sup>  
and Hongliang Duan\*<sup>bc</sup>

<sup>a</sup> College of Chemical Engineering, Zhejiang University of Technology, Hangzhou 310014, P. R. China

<sup>b</sup> Artificial Intelligence Aided Drug Discovery Institute, College of Pharmaceutical Sciences, Zhejiang University of Technology, Hangzhou 310014, P. R. China.

<sup>c</sup> State Key Laboratory of Drug Research, Shanghai Institute of Materia Medica (SIMM), Chinese Academy of Sciences, Shanghai 201203, China.

\*Email: hduan@zjut.edu.cn

<sup>d</sup> Shanghai Institute of Material Medical, Chinese Academy of Sciences, Shanghai 201203, P. R. China.

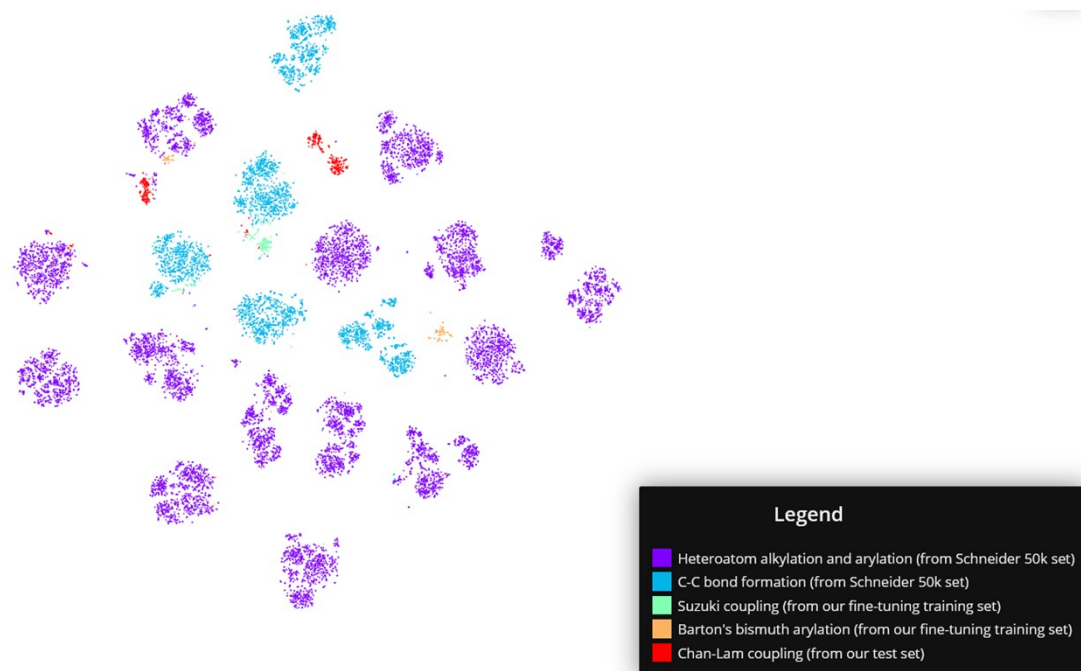

**Supplementary Fig. 1** Reactions in the fine-tuned dataset and test set of our study are classified, as well as two related types of reactions in the Schneider 50K.<sup>1</sup> The Schneider 50K set is Not used to train our model, but only for visualization purposes. The fingerprints are generated using *rxnfp*,<sup>2</sup> and the reactions are visualized using t-SNE algorithm.<sup>3</sup>

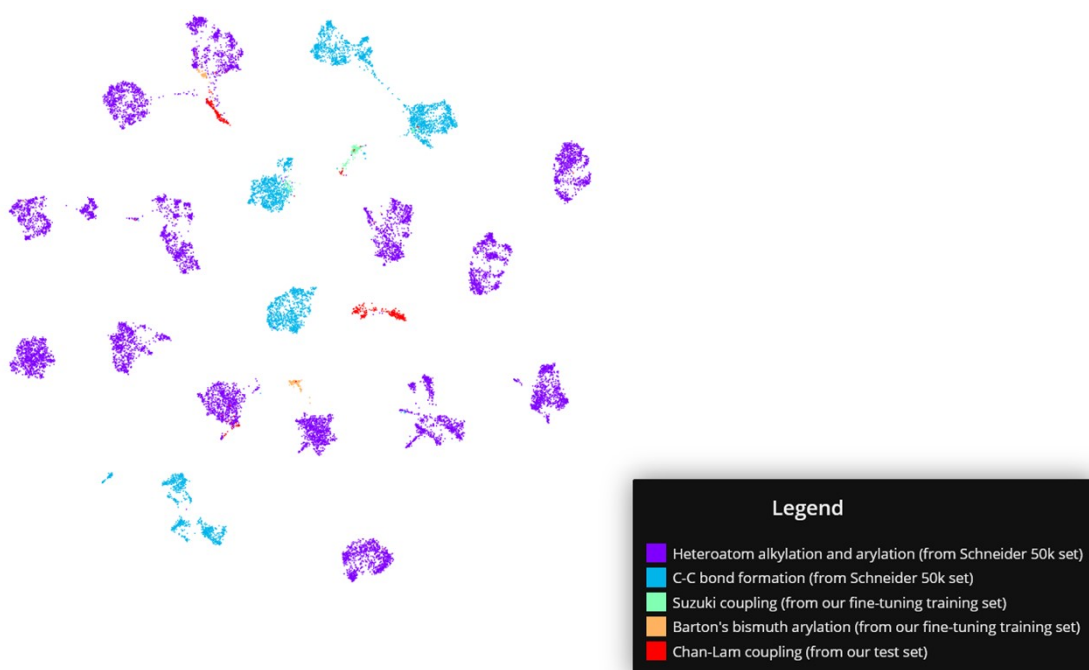

**Supplementary Fig. 2** Reactions in the fine-tuned dataset and test set of our study are classified, as well as two related types of reactions in the Schneider 50K<sup>1</sup>. The Schneider 50K set is Not used to train our model, but only for visualization purposes. The fingerprints are generated using *rxnfp*,<sup>2</sup> and the reactions are visualized using UMAP algorithm<sup>4</sup>.

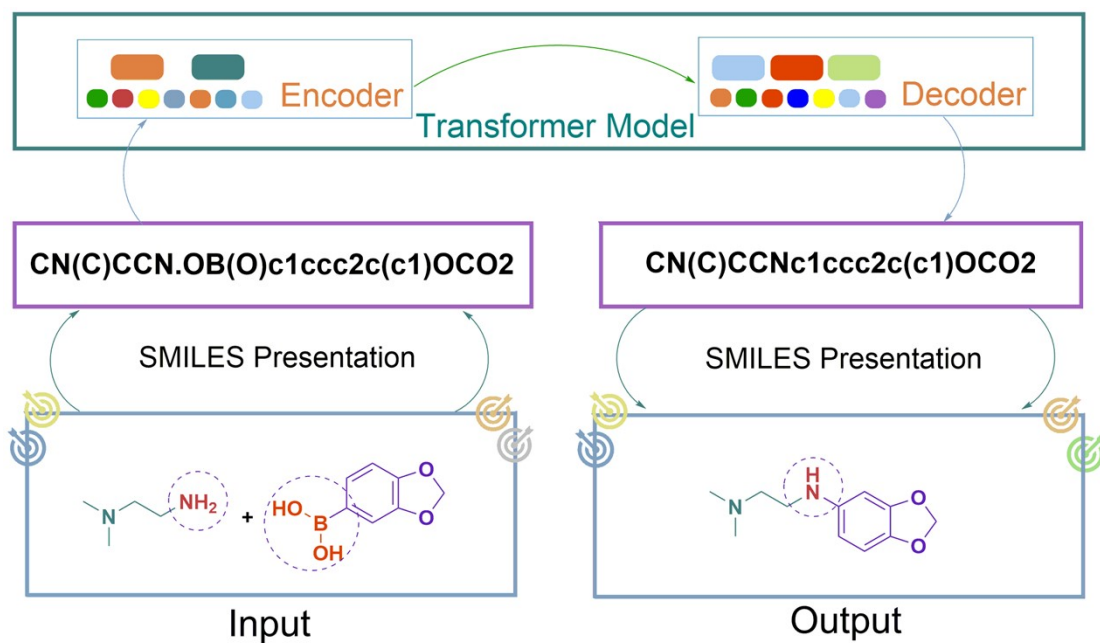

**Supplementary Fig. 3** The process of reaction prediction by the Transformer. The Transformer model is composed of encoder and decoder.

**Supplementary Table 1 Examples of C-N coupling reactions correctly predicted via ZSRP model.**

| Reactant type           | Reactants | Zero-shot learning's prediction |
|-------------------------|-----------|---------------------------------|
| Amide (linear)          |           |                                 |
| Amide (cyclic)          |           |                                 |
| Aliphatic amine         |           |                                 |
| Aromatic amine          |           |                                 |
| N-aromatic heterocyclic |           |                                 |

**Supplementary Table 2 Performance of ZSRP model for C-O Chan-Lam coupling categorized by reactant type.**

| Reactant type     | Test samples | Top-1 accuracy (%) |
|-------------------|--------------|--------------------|
| Aromatic alcohol  | 133          | 69.9               |
| Aliphatic alcohol | 23           | 34.8               |
| Amide alcohol     | 4            | 75.0               |
| Total             | 160          | 65.0               |

**Supplementary Table 3 Performance of ZSRP model for C-S Chan-Lam coupling categorized by reactant type.**

| Reactant type | Test samples | Top-1 accuracy (%) |
|---------------|--------------|--------------------|
| Thiophenol    | 20           | 85.0               |
| Thiol         | 6            | 83.3               |
| Total         | 26           | 84.6               |

**Supplementary Table 4 Examples of C-O/C-S/C-C Chan-Lam coupling correctly predicted via ZSRP model.**

| Reactant type           | Reactant                                                                            | Zero-shot learning's prediction                                                       |
|-------------------------|-------------------------------------------------------------------------------------|---------------------------------------------------------------------------------------|
| Aromatic alcohol (C-O)  | 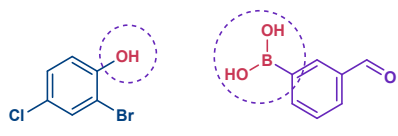   |    |
| Aliphatic alcohol (C-O) |    |    |
| Amide alcohol (C-O)     |    |    |
| Thiophenol (C-S)        |   |   |
| Thiol (C-S)             |  |  |
| Methylene (C-C)         |  |  |

**Supplementary Table 5 OSRP performance of the training Chan-Lam coupling reaction varies with the training steps, the training Chan-Lam coupling reaction sample is the first reaction in the Table 4.**

| Steps | Top-1 accuracy (%) |      |
|-------|--------------------|------|
|       | Validation         | Test |
| 0     | 55.1               | 55.7 |
| 50    | 83.1               | 86.8 |
| 100   | 83.6               | 86.8 |
| 150   | 84.0               | 86.8 |
| 200   | 84.0               | 86.6 |
| 250   | 83.8               | 87.1 |

|     |      |      |
|-----|------|------|
| 300 | 83.6 | 87.1 |
| 350 | 83.8 | 87.1 |
| 400 | 83.8 | 87.1 |
| 450 | 83.6 | 87.1 |
| 500 | 83.8 | 86.4 |
| 550 | 83.8 | 86.8 |
| 600 | 83.8 | 86.8 |

**Supplementary Table 6 OSRP performance of the training Chan-Lam coupling reaction varies with the training steps, the training Chan-Lam coupling reaction sample is the second reaction in the Table 4.**

| Steps | Top-1 accuracy (%) |      |
|-------|--------------------|------|
|       | Validation         | Test |
| 0     | 55.1               | 55.7 |
| 50    | 76.4               | 81.5 |
| 100   | 77.5               | 82.0 |
| 150   | 78.0               | 82.4 |
| 200   | 78.2               | 82.6 |
| 250   | 78.2               | 82.6 |
| 300   | 78.9               | 82.8 |
| 350   | 78.9               | 83.5 |
| 400   | 78.9               | 83.5 |
| 450   | 79.1               | 83.5 |
| 500   | 78.9               | 83.7 |
| 550   | 78.9               | 83.9 |
| 600   | 79.1               | 83.9 |

**Supplementary Table 7 OSRP performance of the training Chan-Lam coupling reaction varies with the training steps, the training Chan-Lam coupling reaction sample is the third reaction in the Table 4.**

| Steps | Top-1 accuracy (%) |      |
|-------|--------------------|------|
|       | Validation         | Test |
| 0     | 55.1               | 55.7 |
| 50    | 77.3               | 79.4 |
| 100   | 77.3               | 80.9 |
| 150   | 77.5               | 81.5 |
| 200   | 77.5               | 81.5 |
| 250   | 77.2               | 81.3 |
| 300   | 77.2               | 81.3 |
| 350   | 77.5               | 81.3 |
| 400   | 77.5               | 81.3 |
| 450   | 77.8               | 81.3 |
| 500   | 77.5               | 81.3 |
| 550   | 76.9               | 81.3 |
| 600   | 77.2               | 81.3 |

**Supplementary Table 8 OSRP performance of the training Chan-Lam coupling reaction varies with the training steps, the training Chan-Lam coupling reaction sample is the fourth reaction in the Table 4.**

| Steps | Top-1 accuracy (%) |      |
|-------|--------------------|------|
|       | Validation         | Test |
| 0     | 55.1               | 55.7 |
| 50    | 60.1               | 59.9 |
| 100   | 59.6               | 61.0 |
| 150   | 60.1               | 61.2 |
| 200   | 59.9               | 61.6 |
| 250   | 60.1               | 62.3 |
| 300   | 60.1               | 62.7 |
| 350   | 59.6               | 62.7 |
| 400   | 59.6               | 62.3 |
| 450   | 59.8               | 62.7 |
| 500   | 59.8               | 62.9 |
| 550   | 60.1               | 63.1 |
| 600   | 60.5               | 63.1 |

**Supplementary Table 9 OSRP performance of the training Chan-Lam coupling reaction varies with the training steps, the training Chan-Lam coupling reaction sample is the fifth reaction in the Table 4.**

| Steps | Top-1 accuracy (%) |      |
|-------|--------------------|------|
|       | Validation         | Test |
| 0     | 55.1               | 55.7 |
| 50    | 61.6               | 67.4 |
| 100   | 63.0               | 67.8 |
| 150   | 64.1               | 68.2 |
| 200   | 65.0               | 68.8 |
| 250   | 65.2               | 68.8 |
| 300   | 65.0               | 69.1 |
| 350   | 65.2               | 69.3 |
| 400   | 65.2               | 69.1 |
| 450   | 65.0               | 69.3 |
| 500   | 65.0               | 69.9 |
| 550   | 65.2               | 69.9 |
| 600   | 66.1               | 70.8 |

**Supplementary Table 10 OSRP performance of the training Chan-Lam coupling reaction varies with the training steps, the training Chan-Lam coupling reaction sample is the sixth reaction in the Table 4.**

| Steps | Top-1 accuracy (%) |      |
|-------|--------------------|------|
|       | Validation         | Test |
| 0     | 55.1               | 55.7 |

|     |      |      |
|-----|------|------|
| 50  | 78.4 | 79.2 |
| 100 | 78.4 | 79.4 |
| 150 | 79.3 | 79.4 |
| 200 | 80.0 | 79.6 |
| 250 | 80.7 | 79.4 |
| 300 | 81.4 | 79.4 |
| 350 | 81.6 | 79.4 |
| 400 | 81.6 | 79.6 |
| 450 | 82.0 | 79.9 |
| 500 | 81.8 | 79.9 |
| 550 | 81.6 | 79.9 |
| 600 | 81.6 | 79.9 |

**Supplementary Table 11 OSRP performance of the training Chan-Lam coupling reaction varies with the training steps, the training Chan-Lam coupling reaction sample is the seventh reaction in the Table 4.**

| Steps | Top-1 accuracy (%) |      |
|-------|--------------------|------|
|       | Validation         | Test |
| 0     | 55.1               | 55.7 |
| 50    | 68.1               | 69.5 |
| 100   | 68.1               | 69.3 |
| 150   | 68.1               | 69.1 |
| 200   | 67.9               | 68.8 |
| 250   | 67.7               | 69.5 |
| 300   | 67.7               | 69.3 |
| 350   | 67.4               | 69.3 |
| 400   | 67.2               | 69.5 |
| 450   | 67.2               | 69.5 |
| 500   | 67.2               | 69.5 |
| 550   | 67.2               | 69.5 |
| 600   | 67.2               | 69.5 |

**Supplementary Table 12 OSRP performance of the training Chan-Lam coupling reaction varies with the training steps, the training Chan-Lam coupling reaction sample is the eighth reaction in the Table 4.**

| Steps | Top-1 accuracy (%) |      |
|-------|--------------------|------|
|       | Validation         | Test |
| 0     | 55.1               | 55.7 |
| 50    | 66.6               | 71.6 |
| 100   | 67.0               | 71.8 |
| 150   | 67.5               | 72.4 |
| 200   | 67.7               | 72.5 |
| 250   | 68.1               | 73.1 |
| 300   | 68.1               | 73.7 |
| 350   | 68.4               | 73.9 |



|     |      |      |
|-----|------|------|
| 400 | 68.6 | 74.4 |
| 450 | 68.6 | 74.4 |
| 500 | 68.6 | 74.6 |
| 550 | 69.3 | 75.0 |
| 600 | 69.3 | 75.2 |

**Supplementary Table 13 OSRP performance of the training Chan-Lam coupling reaction varies with the training steps, the training Chan-Lam coupling reaction sample is the ninth reaction in the Table 4.**

| Steps | Top-1 accuracy (%) |      |
|-------|--------------------|------|
|       | Validation         | Test |
| 0     | 55.1               | 55.7 |
| 50    | 57.6               | 61.6 |
| 100   | 58.7               | 62.1 |
| 150   | 58.7               | 62.1 |
| 200   | 58.5               | 61.9 |
| 250   | 58.3               | 61.9 |
| 300   | 58.5               | 61.9 |
| 350   | 58.3               | 61.6 |
| 400   | 58.0               | 61.6 |
| 450   | 58.0               | 61.6 |
| 500   | 58.3               | 61.6 |
| 550   | 58.7               | 61.5 |
| 600   | 58.9               | 61.8 |

**Supplementary Table 14 OSRP performance of the training Chan-Lam coupling reaction varies with the training steps, the training Chan-Lam coupling reaction sample is the tenth reaction in the Table 4.**

| Steps | Top-1 accuracy (%) |      |
|-------|--------------------|------|
|       | Validation         | Test |
| 0     | 55.1               | 55.7 |
| 50    | 64.8               | 65.0 |
| 100   | 63.9               | 65.0 |
| 150   | 64.1               | 65.2 |
| 200   | 63.4               | 65.5 |
| 250   | 63.0               | 65.0 |
| 300   | 62.5               | 65.2 |
| 350   | 62.5               | 65.0 |
| 400   | 62.3               | 64.6 |
| 450   | 62.3               | 64.0 |
| 500   | 62.3               | 63.8 |
| 550   | 62.3               | 63.8 |
| 600   | 62.3               | 63.8 |

**Supplementary Table 15 OSRP performance of the training Chan-Lam coupling reaction varies with the training steps, the training Chan-Lam coupling reaction sample is the eleventh reaction**

in the Table 4.

| Steps | Top-1 accuracy (%) |      |
|-------|--------------------|------|
|       | Validation         | Test |
| 0     | 55.1               | 55.7 |
| 50    | 68.8               | 70.3 |
| 100   | 69.0               | 70.5 |
| 150   | 69.5               | 70.8 |
| 200   | 69.5               | 71.2 |
| 250   | 69.5               | 71.0 |
| 300   | 69.5               | 71.2 |
| 350   | 69.0               | 71.0 |
| 400   | 69.0               | 71.0 |
| 450   | 69.0               | 70.8 |
| 500   | 68.6               | 70.8 |
| 550   | 68.8               | 70.8 |
| 600   | 68.8               | 70.8 |

Supplementary Table 16 OSRP performance of the training Chan-Lam coupling reaction varies with the training steps, the training Chan-Lam coupling reaction sample is the twelfth reaction in the Table 4.

| Steps | Top-1 accuracy (%) |      |
|-------|--------------------|------|
|       | Validation         | Test |
| 0     | 55.1               | 55.7 |
| 50    | 61.9               | 64.2 |
| 100   | 61.9               | 63.7 |
| 150   | 61.4               | 63.5 |
| 200   | 61.0               | 63.5 |
| 250   | 60.8               | 64.0 |
| 300   | 61.0               | 64.0 |
| 350   | 61.0               | 63.8 |
| 400   | 61.0               | 63.8 |
| 450   | 60.8               | 63.8 |
| 500   | 60.8               | 64.0 |
| 550   | 60.6               | 64.0 |
| 600   | 60.6               | 63.6 |

Supplementary Table 17 The corresponding performance of ZSRP and OSRP model trained with reactions which contained reagents.

|      |     | model                   | Top-1 accuracy (%) |
|------|-----|-------------------------|--------------------|
|      |     | ZSRP                    | 51.4               |
| OSRP | C-N | N-aromatic heterocyclic | 76.9               |
|      | C-N | N-aromatic heterocyclic | 83.8               |
|      | C-N | Aromatic amine          | 77.9               |
|      | C-N | Aliphatic amine         | 67.6               |
|      | C-N | Amide (cyclic)          | 75.1               |

|     |                   |      |
|-----|-------------------|------|
| C-N | Amide (linear)    | 81.1 |
| C-O | Aromatic alcohol  | 75.0 |
| C-O | Aliphatic alcohol | 71.2 |
| C-O | Amide alcohol     | 69.5 |
| C-O | Aromatic alcohol  | 71.2 |
| C-S | Thiophenol        | 68.9 |
| C-C | Methylene         | 67.9 |

**Supplementary Table 18 Prediction performance with different fine-tuning strategies.**

| Training Set            | Fine-tuning           | Top-1 Accuracy (%)                        |
|-------------------------|-----------------------|-------------------------------------------|
| USPTO + Suzuki + Barton | 1 sample (one-shot)   | 87.1 (highest), 61.6(lowest), 72.3 (mean) |
| USPTO + Suzuki + Barton | 12 samples (few-shot) | 92.2                                      |
| USPTO + Suzuki + Barton | 101 samples           | 94.3                                      |

**Supplementary Table 19 Distribution of the transformer model with OSRP categorized by coupling type.**

| Coupling type | Count of examples <sup>a</sup> |
|---------------|--------------------------------|
| C-N           | 106                            |
| C-O           | 45                             |
| C-S           | 2                              |
| Total         | 153                            |

<sup>a</sup>Examples of reactions where the transformer model with ZSRP predicts wrong but the model with OSRP predicts correct.

**Supplementary Table 20 Test performance categorized by coupling type.**

| Coupling type | Test Samples | Top-1 accuracy (%)              |                          |
|---------------|--------------|---------------------------------|--------------------------|
|               |              | One-shot<br>(1 sample, highest) | Few-shot<br>(12 samples) |
| C-N           | 283          | 83.4                            | 89.0                     |
| C-O           | 160          | 93.1                            | 96.3                     |
| C-S           | 26           | 88.5                            | 100.0                    |
| C-C           | 3            | 100.0                           | 100.0                    |
| Total         | 472          | 87.1                            | 92.2                     |

**Supplementary Table 21 Test performance for C-N Chan-Lam coupling categorized by reactant type.**

| Reactant type | Test Samples | Top-1 accuracy (%) |          |
|---------------|--------------|--------------------|----------|
|               |              | One-shot           | Few-shot |

|                         |     | (1 sample, highest) | (12 samples) |
|-------------------------|-----|---------------------|--------------|
| Amide (linear)          | 19  | 89.5                | 78.9         |
| Amide (cyclic)          | 62  | 79.0                | 83.9         |
| Aliphatic amine         | 49  | 73.5                | 85.7         |
| Aromatic amine          | 77  | 91.0                | 93.5         |
| N-aromatic heterocyclic | 76  | 84.2                | 93.4         |
| Total                   | 283 | 83.4                | 89.0         |

**Supplementary Table 22 Test performance for C-O Chan-Lam coupling categorized by reactant type.**

| Reactant type     | Test Samples | Top-1 accuracy (%)              |                          |
|-------------------|--------------|---------------------------------|--------------------------|
|                   |              | One-shot<br>(1 sample, highest) | Few-shot<br>(12 samples) |
| Aromatic alcohol  | 133          | 94.7                            | 98.5                     |
| Aliphatic alcohol | 23           | 86.9                            | 87.0                     |
| Amide alcohol     | 4            | 75.0                            | 75.0                     |
| Total             | 160          | 93.1                            | 96.3                     |

**Supplementary Table 23 Test performance for C-S Chan-Lam coupling categorized by reactant type.**

| Reactant type | Test Samples | Top-1 accuracy (%)              |                          |
|---------------|--------------|---------------------------------|--------------------------|
|               |              | One-shot<br>(1 sample, highest) | Few-shot<br>(12 samples) |
| Thiophenol    | 20           | 90.0                            | 100.0                    |
| Thiol         | 6            | 83.3                            | 100.0                    |
| Total         | 26           | 88.5                            | 100.0                    |

**Supplementary Table 24 Major reaction datasets used in this study.**

| Dataset                    | Count  |
|----------------------------|--------|
| USPTO dataset              | 367726 |
| Suzuki reaction            | 200    |
| Barton's bismuth arylation | 148    |
| Chan-Lam coupling reaction | 1031   |

## References

1. N. Schneider, D. M. Lowe, R. A. Sayle and G. A. Landrum, Development of a novel fingerprint for chemical reactions and its application to large-scale reaction classification and similarity, *J. Chem. Inf. Model.*, 2015, **55**, 39-53.
2. P. Schwaller *et al.*, Mapping the space of chemical reactions using attention-based neural networks,

*Nat. Mach. Intell.*, 2021, **3**, 144-152.

3. L. Van der Maaten and G. Hinton, Visualizing data using t-SNE, *J. Mach. Learn. Res.*, 2008, **9**, 2579-2605.
4. McInnes, L., Healy, J. & Melville, J. Umap: uniform manifold approximation and projection for dimension reduction. Preprint at <https://arxiv.org/abs/1802.03426> (2018).
